# Supplementary material for: Association between cheese and fish consumption and the occurrence of depression based on European population: mediating role of metabolites
Source: Front Nutr. 2024 Apr 17;11:1322254. doi: 10.3389/fnut.2024.1322254 (PMC11061354; doi:10.3389/fnut.2024.1322254)
Supplement: Supplementary file 2 [file Table_2.XLSX]

## Sheet: Sheet1
Table S1. Genetic instruments of cheese intake and 9 candidate mediators
Phenotype	SNP	Chr	pos	effect_allele	other_allele	beta	se	pval	eaf
Cheese intke	rs1073242	13	58715219	A	G	0.015728	0.00229156	6.7e-12	0.553825
Cheese intke	rs10896050	11	65577516	T	G	-0.0184695	0.00283438	7.2e-11	0.193171
Cheese intke	rs10938397	4	45182527	G	A	-0.0127071	0.00225751	1.8e-08	0.434462
Cheese intke	rs113367286	7	140144414	T	C	0.0151797	0.00249985	1.3e-09	0.278467
Cheese intke	rs11620149	13	89816082	C	T	-0.0176745	0.0032085	3.6e-08	0.143308
Cheese intke	rs11649653	16	30918487	G	C	0.0138485	0.00229169	1.5e-09	0.38208
Cheese intke	rs12296440	12	49927148	A	G	0.0187942	0.00297985	2.8e-10	0.169681
Cheese intke	rs12447542	16	7744180	A	G	0.0197476	0.00340698	6.8e-09	0.12558
Cheese intke	rs12475594	2	58433375	G	A	0.0160073	0.00292518	4.4e-08	0.178459
Cheese intke	rs12672200	7	115461436	A	G	-0.0137634	0.00239456	9e-09	0.325794
Cheese intke	rs12786959	11	89943676	T	A	-0.0160712	0.00281988	1.2e-08	0.196267
Cheese intke	rs1291145	20	35528475	C	T	-0.0202495	0.00241026	4.4e-17	0.685848
Cheese intke	rs12951057	17	44794558	G	C	-0.0211557	0.00304376	3.6e-12	0.165627
Cheese intke	rs13107325	4	103188709	T	C	-0.0291639	0.00425285	7e-12	0.074693
Cheese intke	rs1434511	18	44829435	T	C	0.0129646	0.00225868	9.5e-09	0.455286
Cheese intke	rs1514755	2	166299635	G	A	0.0163749	0.00261651	3.9e-10	0.239596
Cheese intke	rs17115145	14	30122409	T	C	-0.0128806	0.00228956	1.8e-08	0.401282
Cheese intke	rs1806771	10	63682387	G	T	-0.0221467	0.004035	4.1e-08	0.087876
Cheese intke	rs1931805	6	62630863	C	T	0.0126363	0.00223591	1.6e-08	0.500062
Cheese intke	rs2339928	2	24049453	A	G	0.0148578	0.00244494	1.2e-09	0.704069
Cheese intke	rs2352974	3	49890613	T	C	-0.0144972	0.0022428	1e-10	0.48979
Cheese intke	rs26579	5	87985295	C	G	-0.0128007	0.00229427	2.4e-08	0.586217
Cheese intke	rs2802530	1	98546134	A	G	0.0186266	0.00339704	4.2e-08	0.876502
Cheese intke	rs2854175	17	61998469	A	C	0.0169937	0.00256857	3.7e-11	0.257474
Cheese intke	rs2960578	18	21143739	G	T	0.0170282	0.00223594	2.6e-14	0.496281
Cheese intke	rs34198643	7	2203808	T	C	-0.0167006	0.00267855	4.5e-10	0.224165
Cheese intke	rs35270670	15	83481880	G	A	0.0163794	0.00270974	1.5e-09	0.217962
Cheese intke	rs3911016	9	88029000	G	T	0.0213573	0.0034399	5.3e-10	0.120938
Cheese intke	rs4296548	3	36915814	G	T	0.0130245	0.00228781	1.2e-08	0.609594
Cheese intke	rs4503172	9	124640841	T	C	0.0129596	0.002293	1.6e-08	0.608301
Cheese intke	rs4681981	3	56704919	A	C	-0.0124361	0.00224121	2.9e-08	0.469086
Cheese intke	rs4692708	4	170228542	C	A	0.0147298	0.00258904	1.3e-08	0.252659
Cheese intke	rs4776970	15	68080886	T	A	0.0154088	0.00232683	3.5e-11	0.357982
Cheese intke	rs4860341	4	61251106	C	T	0.0243652	0.00435152	2.2e-08	0.928742
Cheese intke	rs504675	2	45154689	T	C	0.0274418	0.00234182	1e-31	0.352634
Cheese intke	rs524468	12	371786	G	A	-0.0142421	0.00255161	2.4e-08	0.260633
Cheese intke	rs531358	1	93676011	T	C	0.0131666	0.00233731	1.8e-08	0.649768
Cheese intke	rs6126641	20	51296552	A	G	0.013226	0.00239492	3.3e-08	0.336196
Cheese intke	rs61734410	16	1252369	T	C	0.016654	0.00262279	2.2e-10	0.255213
Cheese intke	rs61953351	12	121456616	T	G	0.0145932	0.00257996	1.5e-08	0.250366
Cheese intke	rs62034322	16	28535834	A	G	-0.0139355	0.00229986	1.4e-09	0.379848
Cheese intke	rs62236533	22	41992169	A	G	0.0247617	0.00364674	1.1e-11	0.108791
Cheese intke	rs62245792	3	68410652	A	T	-0.0179341	0.00316317	1.4e-08	0.150049
Cheese intke	rs6685323	1	154295592	T	C	-0.0131886	0.00241592	4.8e-08	0.309293
Cheese intke	rs67238148	11	7946480	T	G	0.0165432	0.00271432	1.1e-09	0.217471
Cheese intke	rs6774906	3	194803510	C	A	0.0316294	0.00567262	2.5e-08	0.040653
Cheese intke	rs6873324	5	153597288	C	A	-0.0124766	0.00227073	3.9e-08	0.425802
Cheese intke	rs7012814	8	9173358	A	G	-0.0185161	0.00225388	2.1e-16	0.473966
Cheese intke	rs71386942	16	71992817	A	C	0.0144554	0.00252205	9.9e-09	0.268947
Cheese intke	rs72970243	2	136484232	A	G	0.0222011	0.00340166	6.7e-11	0.12044
Cheese intke	rs7298331	12	22322789	C	A	-0.013175	0.00230588	1.1e-08	0.604531
Cheese intke	rs73024305	11	124942269	C	G	0.0325373	0.00492718	4e-11	0.054789
Cheese intke	rs73096946	4	17788715	C	T	-0.0205914	0.00306664	1.9e-11	0.157396
Cheese intke	rs73335955	10	106766879	C	T	0.0277726	0.00497824	2.4e-08	0.05334
Cheese intke	rs7386207	8	144246027	T	C	-0.0124974	0.00226925	3.6e-08	0.563517
Cheese intke	rs77742462	3	107637010	G	A	-0.0474668	0.00827804	9.8e-09	0.020525
Cheese intke	rs78876700	1	4670487	A	G	0.0180965	0.00327852	3.4e-08	0.137431
Cheese intke	rs79184944	3	161549397	A	T	0.0196018	0.00328458	2.4e-09	0.134346
Cheese intke	rs7936836	11	43633645	A	C	0.0159029	0.00227272	2.6e-12	0.417538
Cheese intke	rs919109	17	46675977	C	G	0.0199382	0.00324329	7.9e-10	0.138752
Cheese intke	rs9504123	6	4478474	C	A	0.0141706	0.00250387	1.5e-08	0.274743
Cheese intke	rs9649582	7	132526871	T	A	-0.0146166	0.00241153	1.4e-09	0.317256
Cheese intke	rs975303	6	19028788	G	A	0.0212756	0.00290699	2.5e-13	0.181313
Triglycerides	rs10159255	1	63020816	A	C	-0.0713	0.005	2.41e-46	NA
Triglycerides	rs1057208	20	44563007	T	C	0.0447	0.0062	6.18e-13	NA
Triglycerides	rs11231693	11	63862612	A	G	0.0641	0.0109	3.85e-09	NA
Triglycerides	rs1128249	2	165528624	T	G	-0.041	0.0049	1.1e-16	NA
Triglycerides	rs112875651	8	126506694	A	G	-0.09	0.0051	2.27e-69	NA
Triglycerides	rs116843064	19	8429323	A	G	-0.2053	0.0145	2e-45	NA
Triglycerides	rs1260326	2	27730940	C	T	-0.1041	0.0051	7.7e-92	NA
Triglycerides	rs1364422	7	130445981	T	C	0.0371	0.0056	3.85e-11	NA
Triglycerides	rs145947882	17	41809207	C	A	0.1252	0.0186	1.74e-11	NA
Triglycerides	rs147233090	15	44028047	T	C	0.1225	0.0183	2.11e-11	NA
Triglycerides	rs1532624	16	57005479	A	C	-0.0274	0.0048	1.36e-08	NA
Triglycerides	rs174554	11	61579463	G	A	0.0375	0.0051	2.19e-13	NA
Triglycerides	rs1800588	15	58723675	T	C	0.0424	0.0064	2.44e-11	NA
Triglycerides	rs2043085	15	58680954	C	T	-0.0322	0.0053	1.06e-09	NA
Triglycerides	rs2068888	10	94839642	A	G	-0.0323	0.005	7.13e-11	NA
Triglycerides	rs2262194	12	123198921	G	T	-0.0344	0.0059	4.92e-09	NA
Triglycerides	rs2296065	1	230301776	A	G	-0.0636	0.0069	1.54e-20	NA
Triglycerides	rs2678379	2	21226560	G	A	0.0569	0.0059	6.43e-22	NA
Triglycerides	rs28650790	5	55861464	T	C	0.052	0.0068	2.34e-14	NA
Triglycerides	rs2943660	2	227128543	G	T	0.0353	0.005	1.86e-12	NA
Triglycerides	rs3093680	17	26664806	C	T	-0.0314	0.0051	5.37e-10	NA
Triglycerides	rs326222	11	47259668	C	T	0.0326	0.0051	2.24e-10	NA
Triglycerides	rs35169323	1	170743175	T	G	-0.0372	0.0066	1.75e-08	NA
Triglycerides	rs35332062	7	73012042	A	G	-0.1162	0.0068	5.99e-65	NA
Triglycerides	rs35353426	8	9297246	T	C	0.0308	0.0056	3.15e-08	NA
Triglycerides	rs3775228	4	87985166	T	C	0.0316	0.0051	3.81e-10	NA
Triglycerides	rs4704834	5	156443066	G	A	0.0339	0.0051	2.57e-11	NA
Triglycerides	rs483082	19	45416178	T	G	0.1095	0.0063	1.84e-67	NA
Triglycerides	rs58542926	19	19379549	T	C	-0.0879	0.0085	3.12e-25	NA
Triglycerides	rs59950280	4	3452345	A	G	0.0356	0.0055	1.1e-10	NA
Triglycerides	rs6070491	20	57093474	T	C	-0.0341	0.0058	4.06e-09	NA
Triglycerides	rs61352607	12	57839173	T	G	-0.0335	0.0054	6.61e-10	NA
Triglycerides	rs7140110	13	114544024	C	T	0.035	0.0057	7.48e-10	NA
Triglycerides	rs76259755	8	19899161	C	T	-0.1718	0.0073	6.4e-124	NA
Triglycerides	rs78357146	17	64305051	G	A	-0.0904	0.0162	2.23e-08	NA
Triglycerides	rs9273369	6	32626484	C	T	-0.0478	0.0073	5.89e-11	NA
Triglycerides	rs987763	6	127281547	T	C	-0.0335	0.0052	8.63e-11	NA
Total cholesterol in large HDL	rs111543310	15	59531818	C	T	0.337634	0.048705	6.88018e-12	0.015958
Total cholesterol in large HDL	rs11632618	15	58724706	A	G	0.215139	0.023086	2.90001e-20	0.059603
Total cholesterol in large HDL	rs174583	11	61609750	T	C	-0.077831	0.010132	2.92012e-14	0.392152
Total cholesterol in large HDL	rs1883025	9	107664301	T	C	-0.072156	0.012455	9.85009e-09	0.193654
Total cholesterol in large HDL	rs247617	16	56990716	A	C	0.209633	0.01079	1.93019e-82	0.297513
Total cholesterol in large HDL	rs261291	15	58680178	C	T	0.179384	0.010165	2.39001e-68	0.373198
Total cholesterol in large HDL	rs291	8	19815852	C	T	0.10065	0.011676	1.45011e-17	0.231014
Total cholesterol in large HDL	rs429358	19	45411941	C	T	-0.091553	0.013419	1.46016e-11	0.169994
Total cholesterol in large HDL	rs59347135	8	19750044	G	C	-0.167291	0.028587	6.99005e-09	0.043114
Total cholesterol in large HDL	rs60439253	15	58874532	T	C	0.235306	0.028232	1.6099e-16	0.035228
Total cholesterol in large HDL	rs6065904	20	44534651	A	G	-0.135338	0.011671	1.71989e-30	0.228686
Total cholesterol in large HDL	rs6507939	18	47176261	C	A	0.094757	0.013468	3.33964e-12	0.843394
Total cholesterol in large HDL	rs6544366	2	21204025	T	G	0.064093	0.011001	8.13992e-09	0.267874
Total cholesterol in large HDL	rs67053123	12	125353810	A	T	0.092051	0.014556	3.89996e-10	0.148501
Total cholesterol in large HDL	rs964184	11	116648917	C	G	0.081863	0.014048	8.06993e-09	0.861774
Cholesterol to total lipids ratio in large HDL	rs10085931	8	18245449	G	A	-0.0372646	0.00495931	2e-15	0.189684
Cholesterol to total lipids ratio in large HDL	rs1047964	11	117156893	T	G	0.220298	0.0197986	1e-27	0.010073
Cholesterol to total lipids ratio in large HDL	rs1057208	20	44563007	T	C	-0.168876	0.00500706	1e-200	0.186275
Cholesterol to total lipids ratio in large HDL	rs10750766	11	65473798	A	C	-0.0274099	0.00428822	2.5e-10	0.70979
Cholesterol to total lipids ratio in large HDL	rs10773049	12	124506631	C	T	0.0310254	0.00399034	5.1e-15	0.393096
Cholesterol to total lipids ratio in large HDL	rs10774625	12	111910219	G	A	0.0261114	0.003899	4.1e-13	0.502837
Cholesterol to total lipids ratio in large HDL	rs10786114	10	95309022	T	C	0.0390608	0.00590665	2.3e-10	0.875672
Cholesterol to total lipids ratio in large HDL	rs10842708	12	26474867	A	G	0.0283963	0.00453622	2.5e-10	0.756244
Cholesterol to total lipids ratio in large HDL	rs10937924	4	3374898	C	T	-0.0244143	0.00396439	3.7e-10	0.59152
Cholesterol to total lipids ratio in large HDL	rs11077783	17	73275747	A	G	-0.024101	0.00423902	2e-08	0.682425
Cholesterol to total lipids ratio in large HDL	rs11207994	1	63047987	T	C	0.0584517	0.00407809	3.6e-47	0.350929
Cholesterol to total lipids ratio in large HDL	rs113563886	16	67947158	C	T	0.0385205	0.00609385	2.5e-11	0.116669
Cholesterol to total lipids ratio in large HDL	rs116843064	19	8429323	A	G	0.231044	0.0139592	5.6e-63	0.019852
Cholesterol to total lipids ratio in large HDL	rs116881820	19	45397952	C	T	0.063929	0.0122624	3.7e-08	0.026043
Cholesterol to total lipids ratio in large HDL	rs117209788	12	124014251	T	C	-0.0429322	0.00677553	3.2e-10	0.090952
Cholesterol to total lipids ratio in large HDL	rs12218613	10	65390634	C	T	0.0206233	0.00395847	2.7e-08	0.57717
Cholesterol to total lipids ratio in large HDL	rs1260326	2	27730940	C	T	0.0757377	0.0039769	6.7e-83	0.603982
Cholesterol to total lipids ratio in large HDL	rs12720828	2	21241744	T	C	-0.0362387	0.00511342	3e-12	0.175784
Cholesterol to total lipids ratio in large HDL	rs12740374	1	109817590	T	G	-0.0535507	0.00468244	6.7e-31	0.221059
Cholesterol to total lipids ratio in large HDL	rs13107325	4	103188709	T	C	-0.0469355	0.00742428	3.6e-11	0.074284
Cholesterol to total lipids ratio in large HDL	rs13118477	4	89704367	A	G	-0.0266632	0.00400126	3.5e-11	0.390377
Cholesterol to total lipids ratio in large HDL	rs13389219	2	165528876	T	C	0.0439826	0.00398574	1.1e-29	0.392528
Cholesterol to total lipids ratio in large HDL	rs144018203	11	116916060	C	G	-0.198587	0.0197044	4e-26	0.010654
Cholesterol to total lipids ratio in large HDL	rs17052058	3	52344680	G	A	0.027673	0.00505057	4.1e-08	0.180833
Cholesterol to total lipids ratio in large HDL	rs174554	11	61579463	G	A	-0.0690302	0.00409437	1.6e-68	0.341706
Cholesterol to total lipids ratio in large HDL	rs17492120	6	25590311	T	C	-0.0313675	0.00582177	2e-08	0.128254
Cholesterol to total lipids ratio in large HDL	rs190543502	15	43757184	C	T	-0.142863	0.0128024	1.7e-29	0.024112
Cholesterol to total lipids ratio in large HDL	rs191555775	6	161005389	T	A	-0.0777365	0.00633515	1.1e-36	0.106388
Cholesterol to total lipids ratio in large HDL	rs1982151	9	86617265	G	A	-0.0248582	0.00446514	4.2e-08	0.743265
Cholesterol to total lipids ratio in large HDL	rs2035403	4	88018991	G	A	-0.0283634	0.00397557	1.8e-14	0.398324
Cholesterol to total lipids ratio in large HDL	rs2068888	10	94839642	A	G	0.0275321	0.00391425	2e-12	0.450086
Cholesterol to total lipids ratio in large HDL	rs2175055	9	1033354	T	C	-0.0230571	0.00424539	3e-08	0.308257
Cholesterol to total lipids ratio in large HDL	rs2302263	11	64021821	T	C	-0.0484209	0.00688522	1.1e-12	0.088118
Cholesterol to total lipids ratio in large HDL	rs236651	7	75044830	A	G	-0.0221108	0.00412608	2.1e-08	0.573864
Cholesterol to total lipids ratio in large HDL	rs2618567	20	17844492	T	G	-0.0252632	0.00411164	4.7e-11	0.658874
Cholesterol to total lipids ratio in large HDL	rs28752510	6	32579626	A	G	-0.0311706	0.00391988	8e-16	0.45744
Cholesterol to total lipids ratio in large HDL	rs28807203	19	45173951	C	A	-0.0624949	0.00903924	1.8e-12	0.049209
Cholesterol to total lipids ratio in large HDL	rs2925979	16	81534790	C	T	0.037318	0.00423344	1.1e-18	0.69893
Cholesterol to total lipids ratio in large HDL	rs2927468	19	45357939	G	A	0.0295048	0.00394596	6.1e-15	0.523267
Cholesterol to total lipids ratio in large HDL	rs2943654	2	227112754	T	C	-0.045196	0.00405788	1.5e-29	0.64513
Cholesterol to total lipids ratio in large HDL	rs3092498	20	44055710	C	T	0.0230932	0.00392558	1.1e-08	0.517387
Cholesterol to total lipids ratio in large HDL	rs3130521	6	31196376	C	T	-0.0238788	0.00401269	2.2e-09	0.616082
Cholesterol to total lipids ratio in large HDL	rs328	8	19819724	G	C	0.149778	0.00645876	3.9e-122	0.10031
Cholesterol to total lipids ratio in large HDL	rs34062580	7	73033559	A	G	0.102799	0.00578709	5.4e-73	0.130287
Cholesterol to total lipids ratio in large HDL	rs3741521	12	125264293	A	G	-0.0303186	0.0042175	2.9e-14	0.669711
Cholesterol to total lipids ratio in large HDL	rs3764261	16	56993324	A	C	0.177549	0.00415089	1e-200	0.324423
Cholesterol to total lipids ratio in large HDL	rs3860847	8	126631799	A	G	-0.0358349	0.00478	4.1e-14	0.212511
Cholesterol to total lipids ratio in large HDL	rs4076834	2	44081627	G	T	-0.0490733	0.00794454	8.9e-10	0.064236
Cholesterol to total lipids ratio in large HDL	rs4519692	3	49873188	T	C	-0.0245967	0.00415928	9.4e-09	0.322246
Cholesterol to total lipids ratio in large HDL	rs4656292	1	161194641	G	A	-0.029435	0.00401729	1.5e-13	0.619566
Cholesterol to total lipids ratio in large HDL	rs4760259	12	57860826	C	T	0.0242289	0.00418341	5.2e-10	0.681954
Cholesterol to total lipids ratio in large HDL	rs58542926	19	19379549	T	C	0.0447729	0.00742026	6.4e-09	0.074402
Cholesterol to total lipids ratio in large HDL	rs6065819	20	44105636	A	C	-0.0419072	0.00609655	3.5e-12	0.116575
Cholesterol to total lipids ratio in large HDL	rs6658257	1	93820684	G	A	-0.0237981	0.00397977	1.1e-09	0.602146
Cholesterol to total lipids ratio in large HDL	rs668459	6	139835689	T	C	0.0288998	0.00395376	2.9e-13	0.590334
Cholesterol to total lipids ratio in large HDL	rs675849	9	15298666	C	T	0.0330224	0.00563104	4.2e-09	0.860645
Cholesterol to total lipids ratio in large HDL	rs67916282	1	39602755	A	T	-0.0274572	0.00474758	1.3e-09	0.214818
Cholesterol to total lipids ratio in large HDL	rs6864091	5	75010002	C	T	0.0358342	0.00405424	1.1e-18	0.362544
Cholesterol to total lipids ratio in large HDL	rs6905288	6	43758873	A	G	-0.0376871	0.00392224	2.6e-22	0.568549
Cholesterol to total lipids ratio in large HDL	rs7012814	8	9173358	A	G	0.0315619	0.00392263	2e-15	0.474255
Cholesterol to total lipids ratio in large HDL	rs72836348	2	111888043	A	G	0.0385477	0.00647467	2e-09	0.102123
Cholesterol to total lipids ratio in large HDL	rs72836561	17	41926126	T	C	-0.124663	0.0111557	9.1e-31	0.031483
Cholesterol to total lipids ratio in large HDL	rs72959041	6	127454893	A	G	-0.0625673	0.00910578	2.2e-12	0.04962
Cholesterol to total lipids ratio in large HDL	rs7357754	9	92207308	G	A	-0.0212546	0.00390245	2.4e-08	0.499831
Cholesterol to total lipids ratio in large HDL	rs75911530	16	57049137	A	G	-0.116316	0.0114603	3.3e-24	0.032886
Cholesterol to total lipids ratio in large HDL	rs78058190	2	219699999	A	G	-0.069973	0.010075	3.6e-11	0.0501
Cholesterol to total lipids ratio in large HDL	rs7810507	7	130437476	A	G	-0.0297402	0.00432854	7.6e-12	0.281086
Cholesterol to total lipids ratio in large HDL	rs79598313	1	27284913	T	C	-0.0776566	0.0129223	2.4e-09	0.023202
Cholesterol to total lipids ratio in large HDL	rs8044652	16	67506247	C	T	0.105145	0.0104646	2e-24	0.962947
Cholesterol to total lipids ratio in large HDL	rs8103315	19	45254168	A	C	0.0362262	0.00584802	2.9e-09	0.135789
Cholesterol to total lipids ratio in large HDL	rs8126001	20	62711459	T	C	0.0251083	0.00389951	1.5e-10	0.488474
Cholesterol to total lipids ratio in large HDL	rs953618	13	57112724	T	G	0.0219909	0.00405119	2.1e-08	0.601956
Cholesterol to total lipids ratio in large HDL	rs964184	11	116648917	C	G	0.162661	0.00573716	3.6e-183	0.867255
Cholesterol to total lipids ratio in large HDL	rs9844972	3	150097635	C	G	-0.043765	0.00772255	3.7e-10	0.070765
Free cholesterol to total lipids ratio in large HDL	rs10042871	5	156439916	A	G	0.0273007	0.00507074	3.8e-08	0.827088
Free cholesterol to total lipids ratio in large HDL	rs102274	11	61557826	C	T	-0.113192	0.00403246	1.6e-188	0.343862
Free cholesterol to total lipids ratio in large HDL	rs10410835	19	45358353	C	T	0.043604	0.00388306	9.5e-31	0.523084
Free cholesterol to total lipids ratio in large HDL	rs10468017	15	58678512	T	C	0.149063	0.00420503	1e-200	0.295934
Free cholesterol to total lipids ratio in large HDL	rs1047964	11	117156893	T	G	0.167638	0.0195136	3.5e-16	0.010073
Free cholesterol to total lipids ratio in large HDL	rs1057208	20	44563007	T	C	-0.221439	0.00493295	1e-200	0.186275
Free cholesterol to total lipids ratio in large HDL	rs10750766	11	65473798	A	C	-0.0223127	0.0042265	1.3e-08	0.70979
Free cholesterol to total lipids ratio in large HDL	rs10787429	10	113949664	C	T	-0.0329686	0.00431285	3.1e-14	0.72557
Free cholesterol to total lipids ratio in large HDL	rs10935473	3	98416900	T	G	-0.0223838	0.00386113	1.6e-09	0.442426
Free cholesterol to total lipids ratio in large HDL	rs11071373	15	58646053	G	A	-0.0438146	0.00489085	3.7e-19	0.194286
Free cholesterol to total lipids ratio in large HDL	rs11075253	16	15148646	A	C	0.0368116	0.00420818	2.7e-19	0.295786
Free cholesterol to total lipids ratio in large HDL	rs111278137	19	45215081	A	G	-0.0721173	0.0136322	2.5e-08	0.021615
Free cholesterol to total lipids ratio in large HDL	rs111929233	12	125378409	C	A	0.0361998	0.00585376	2.5e-10	0.123196
Free cholesterol to total lipids ratio in large HDL	rs114938914	2	44055510	T	C	-0.0769877	0.00804242	1.7e-21	0.061414
Free cholesterol to total lipids ratio in large HDL	rs11591147	1	55505647	T	G	-0.214168	0.0146219	2.9e-52	0.017458
Free cholesterol to total lipids ratio in large HDL	rs1173727	5	32830521	C	T	-0.021216	0.00390546	4.4e-08	0.59607
Free cholesterol to total lipids ratio in large HDL	rs11751347	6	161092438	T	C	-0.049052	0.00637241	3.7e-14	0.102256
Free cholesterol to total lipids ratio in large HDL	rs12574410	11	47169228	C	G	0.0295636	0.00546397	3.3e-08	0.144173
Free cholesterol to total lipids ratio in large HDL	rs12740374	1	109817590	T	G	-0.0819289	0.00461692	3e-73	0.221059
Free cholesterol to total lipids ratio in large HDL	rs13108218	4	3443931	G	A	0.0281174	0.00397349	5.5e-13	0.615355
Free cholesterol to total lipids ratio in large HDL	rs1561139	16	56852822	T	G	0.0259034	0.00388252	6.2e-12	0.425896
Free cholesterol to total lipids ratio in large HDL	rs1569209	8	19830170	G	T	0.0926442	0.0068597	6.9e-44	0.085311
Free cholesterol to total lipids ratio in large HDL	rs1635852	7	28189411	C	T	0.0219905	0.00384948	6e-09	0.505966
Free cholesterol to total lipids ratio in large HDL	rs17041868	2	111894720	C	T	-0.0437971	0.00784586	1.8e-08	0.063613
Free cholesterol to total lipids ratio in large HDL	rs198375	1	11913757	C	T	0.0216569	0.00391379	4.3e-08	0.3976
Free cholesterol to total lipids ratio in large HDL	rs2024570	20	44776543	C	T	-0.0750434	0.0106496	4.6e-13	0.962635
Free cholesterol to total lipids ratio in large HDL	rs2302783	17	66447073	C	T	0.023964	0.00425011	1.9e-08	0.714876
Free cholesterol to total lipids ratio in large HDL	rs236651	7	75101427	A	G	-0.0234458	0.00406765	3.1e-09	0.573864
Free cholesterol to total lipids ratio in large HDL	rs2618566	20	17844684	T	G	-0.0323183	0.00405156	6.6e-17	0.660287
Free cholesterol to total lipids ratio in large HDL	rs2642438	1	220970028	G	A	0.028081	0.00420308	1.2e-11	0.703836
Free cholesterol to total lipids ratio in large HDL	rs28807203	19	45173951	C	A	-0.101905	0.00889454	1.5e-31	0.049209
Free cholesterol to total lipids ratio in large HDL	rs2943654	2	227112754	T	C	-0.0300249	0.00399983	4.1e-15	0.64513
Free cholesterol to total lipids ratio in large HDL	rs3092498	20	44055710	C	T	0.028664	0.00386747	7.3e-14	0.517387
Free cholesterol to total lipids ratio in large HDL	rs34060476	7	73037956	G	A	0.087145	0.00562617	4.5e-57	0.134803
Free cholesterol to total lipids ratio in large HDL	rs35518360	4	103146890	T	A	-0.0397927	0.00716126	1e-08	0.082733
Free cholesterol to total lipids ratio in large HDL	rs3936510	5	55860866	T	G	-0.0289912	0.00478097	2.5e-10	0.201954
Free cholesterol to total lipids ratio in large HDL	rs4650999	1	178532188	T	G	-0.0221012	0.00384908	3.9e-09	0.533405
Free cholesterol to total lipids ratio in large HDL	rs472495	1	55521313	T	G	0.0269828	0.00401669	4e-11	0.649117
Free cholesterol to total lipids ratio in large HDL	rs4775022	15	58499265	G	A	0.0987033	0.0163577	1e-09	0.985143
Free cholesterol to total lipids ratio in large HDL	rs5082	1	161193683	A	G	-0.0408728	0.00396434	6.6e-25	0.620745
Free cholesterol to total lipids ratio in large HDL	rs563290	2	21288226	A	G	0.0937263	0.00497847	1.1e-84	0.819483
Free cholesterol to total lipids ratio in large HDL	rs56823429	16	81533789	A	C	0.0243399	0.00419847	8.6e-09	0.701586
Free cholesterol to total lipids ratio in large HDL	rs6065819	20	44105636	A	C	-0.046421	0.00600632	1.9e-15	0.116575
Free cholesterol to total lipids ratio in large HDL	rs633695	15	58725839	G	A	0.112089	0.00422995	3.6e-157	0.29236
Free cholesterol to total lipids ratio in large HDL	rs653178	12	112007756	T	C	0.0233954	0.00384597	5.6e-10	0.51605
Free cholesterol to total lipids ratio in large HDL	rs675849	9	15298666	C	T	0.0301893	0.00555183	2.6e-08	0.860645
Free cholesterol to total lipids ratio in large HDL	rs6905288	6	43758873	A	G	-0.0241405	0.00386814	3.6e-10	0.568549
Free cholesterol to total lipids ratio in large HDL	rs705379	7	94953895	A	G	-0.0293497	0.0038793	9.3e-16	0.477478
Free cholesterol to total lipids ratio in large HDL	rs72660960	1	25816847	C	T	0.0206446	0.00385617	1.2e-08	0.44499
Free cholesterol to total lipids ratio in large HDL	rs72698182	1	154533863	C	G	0.0378387	0.00721536	3.2e-08	0.078147
Free cholesterol to total lipids ratio in large HDL	rs72836561	17	41926126	T	C	-0.102808	0.0109957	2.3e-22	0.031483
Free cholesterol to total lipids ratio in large HDL	rs72934503	6	98588754	G	A	0.0227625	0.00393656	2.1e-08	0.451393
Free cholesterol to total lipids ratio in large HDL	rs73013176	19	11147526	C	T	-0.110871	0.0184379	2.1e-10	0.011282
Free cholesterol to total lipids ratio in large HDL	rs73015021	19	11192915	G	A	-0.106413	0.00587406	1.7e-75	0.120658
Free cholesterol to total lipids ratio in large HDL	rs7310409	12	121424861	G	A	-0.0284347	0.00396062	3e-13	0.620327
Free cholesterol to total lipids ratio in large HDL	rs75003668	17	64195431	G	A	0.0738346	0.0108553	1.9e-11	0.033359
Free cholesterol to total lipids ratio in large HDL	rs7733436	5	74666492	T	C	0.0456092	0.00394981	5.5e-31	0.381473
Free cholesterol to total lipids ratio in large HDL	rs77542162	17	67081278	G	A	0.12212	0.0129137	2.3e-21	0.022667
Free cholesterol to total lipids ratio in large HDL	rs780093	2	27742603	C	T	0.0483503	0.00394094	2.9e-37	0.615152
Free cholesterol to total lipids ratio in large HDL	rs7897379	10	65301725	C	T	0.0252036	0.00384272	2.5e-12	0.479366
Free cholesterol to total lipids ratio in large HDL	rs7924631	11	10324061	G	A	-0.0240613	0.00386728	4.3e-10	0.552638
Free cholesterol to total lipids ratio in large HDL	rs821840	16	56994528	G	A	0.118324	0.00409938	8.89e-193	0.324538
Free cholesterol to total lipids ratio in large HDL	rs838876	12	125259888	G	A	-0.0261967	0.00417782	4.3e-11	0.681444
Free cholesterol to total lipids ratio in large HDL	rs9461680	6	31243347	T	C	-0.0321558	0.00507196	2.8e-10	0.174799
Free cholesterol to total lipids ratio in large HDL	rs964184	11	116648917	C	G	0.0897024	0.00565458	4.5e-56	0.867255
Free cholesterol to total lipids ratio in large HDL	rs9769088	7	1081442	C	T	-0.0360625	0.0039549	3.3e-21	0.390949
Glycine	rs10190808	2	211993631	C	G	0.0346173	0.00567191	2.4e-09	0.136421
Glycine	rs10197334	2	211371267	A	G	0.0367698	0.00597574	2.2e-09	0.120035
Glycine	rs1047891	2	211540507	A	C	0.535381	0.00417896	1e-200	0.314959
Glycine	rs10934753	3	125906179	A	G	0.0690031	0.00396232	3.4e-74	0.417116
Glycine	rs11045886	12	21391608	C	A	0.0306817	0.00527911	8.3e-09	0.165117
Glycine	rs11172190	12	57766305	T	C	0.0236924	0.00391137	1e-10	0.503709
Glycine	rs112247225	16	81154900	T	C	-0.128232	0.00928506	5.2e-45	0.046621
Glycine	rs11242109	5	131677047	T	G	0.0226052	0.00390095	2e-08	0.47905
Glycine	rs11666281	19	18234588	T	C	-0.0370833	0.00447889	1.3e-17	0.25424
Glycine	rs13107325	4	103188709	T	C	-0.0494356	0.0074327	3e-13	0.074309
Glycine	rs149181595	15	43685807	C	A	0.0942587	0.0119122	3.9e-17	0.027601
Glycine	rs17722201	2	209645912	C	T	0.0275746	0.0047091	9.8e-09	0.219135
Glycine	rs1801133	1	11856378	A	G	0.0233077	0.00411334	1.8e-08	0.337391
Glycine	rs1965869	4	89677537	C	T	-0.0242087	0.00433173	9e-09	0.715726
Glycine	rs2026972	9	6538279	C	G	-0.0821551	0.00423213	2.2e-87	0.308331
Glycine	rs2168101	11	8255408	A	C	-0.029436	0.00435985	3.9e-11	0.308174
Glycine	rs2608913	6	131870261	C	T	-0.0243496	0.00473667	2.3e-08	0.217028
Glycine	rs2657879	12	56865338	G	A	0.0478885	0.00503846	5.2e-22	0.182536
Glycine	rs2711697	12	47265729	C	A	0.0265213	0.00403408	1.1e-11	0.369926
Glycine	rs28435239	9	5989087	A	G	-0.0289595	0.00464908	8.6e-10	0.769224
Glycine	rs2972154	2	227065811	T	C	-0.0224779	0.00389621	3.1e-08	0.538836
Glycine	rs34945403	15	58430763	G	A	-0.0634669	0.00803649	1.7e-15	0.067631
Glycine	rs36105243	2	165524751	G	C	0.0258325	0.0040737	5.3e-11	0.347118
Glycine	rs369648654	17	45523858	T	G	-0.0396909	0.0039143	2.2e-24	0.488613
Glycine	rs4240624	8	9184231	A	G	-0.126861	0.0067925	2e-82	0.90923
Glycine	rs4380169	2	212145768	C	T	-0.0421118	0.00389505	3.6e-27	0.490602
Glycine	rs4889229	16	81113672	T	C	0.117726	0.00710078	4.2e-64	0.917408
Glycine	rs555754	6	160769423	A	G	0.0232943	0.00391589	1.2e-09	0.468479
Glycine	rs56113850	19	41353107	C	T	-0.021904	0.00395401	2.4e-08	0.579158
Glycine	rs561931	1	120254506	G	A	0.0290991	0.00395877	4.5e-14	0.580975
Glycine	rs56819961	12	47137673	C	T	0.0426129	0.00476144	1.4e-20	0.212573
Glycine	rs62203720	2	211482273	G	T	0.134687	0.0166004	5.6e-17	0.015194
Glycine	rs6587644	1	151994458	A	G	0.0221024	0.0042589	2.4e-08	0.304982
Glycine	rs6601302	8	9239458	G	T	0.0276846	0.00451599	2.1e-10	0.750342
Glycine	rs67523949	12	348506	T	C	0.0263338	0.00390958	3.3e-11	0.536231
Glycine	rs7188156	16	79938114	G	T	0.0317192	0.00555934	1.2e-08	0.14474
Glycine	rs7515955	1	76151253	T	A	0.041698	0.00413375	3.3e-26	0.33485
Glycine	rs75604103	2	211692010	G	A	-0.0989874	0.00600713	1.1e-60	0.121625
Glycine	rs7704653	5	90255685	G	A	-0.0316456	0.00440866	3.7e-13	0.724033
Glycine	rs7800001	7	56072010	C	T	0.0723549	0.00455239	5.5e-61	0.755284
Glycine	rs79687284	1	214150821	C	G	0.0679817	0.0106777	7.8e-11	0.034645
Phospholipids to total lipids ratio in very large HDL	rs102274	11	61557826	C	T	-0.0675756	0.00398756	1.8e-69	0.343855
Phospholipids to total lipids ratio in very large HDL	rs10457487	6	127519234	A	C	-0.024039	0.00381548	8.3e-11	0.484317
Phospholipids to total lipids ratio in very large HDL	rs1047964	11	117156893	T	G	0.153533	0.0193008	4.8e-15	0.010067
Phospholipids to total lipids ratio in very large HDL	rs10503426	8	11589383	T	G	-0.0224816	0.00386136	1e-08	0.43032
Phospholipids to total lipids ratio in very large HDL	rs1052373	11	47354787	T	C	0.0216304	0.00405611	2.8e-08	0.321917
Phospholipids to total lipids ratio in very large HDL	rs1057208	20	44563007	T	C	-0.207977	0.00487516	1e-200	0.186254
Phospholipids to total lipids ratio in very large HDL	rs10756792	9	16726119	T	C	0.0230065	0.00434576	3.8e-08	0.742227
Phospholipids to total lipids ratio in very large HDL	rs10846606	12	124620185	G	C	0.0239499	0.00396689	7e-09	0.366509
Phospholipids to total lipids ratio in very large HDL	rs1126673	4	100045616	T	C	-0.028789	0.00413473	1.2e-12	0.697852
Phospholipids to total lipids ratio in very large HDL	rs112875651	8	126506694	A	G	0.0363212	0.0039395	1.1e-22	0.392351
Phospholipids to total lipids ratio in very large HDL	rs116843064	19	8429323	A	G	0.100928	0.0136105	5.6e-13	0.019852
Phospholipids to total lipids ratio in very large HDL	rs12443634	16	81524274	C	A	0.0240455	0.00421982	6.9e-09	0.713064
Phospholipids to total lipids ratio in very large HDL	rs1260326	2	27730940	C	T	0.0561747	0.00387643	4.3e-51	0.603978
Phospholipids to total lipids ratio in very large HDL	rs1277930	1	109822143	A	G	-0.0320934	0.00451626	2.2e-13	0.772526
Phospholipids to total lipids ratio in very large HDL	rs12914626	15	58738423	T	C	-0.0982518	0.00416564	1.9e-127	0.701916
Phospholipids to total lipids ratio in very large HDL	rs12934018	16	72074318	T	C	-0.0276801	0.0043608	1.2e-10	0.269265
Phospholipids to total lipids ratio in very large HDL	rs13107325	4	103188709	T	C	-0.0450824	0.00723073	4.3e-10	0.074288
Phospholipids to total lipids ratio in very large HDL	rs13108218	4	3443931	G	A	0.0318911	0.00392612	8.7e-16	0.615361
Phospholipids to total lipids ratio in very large HDL	rs13338063	16	56838978	G	T	0.0246019	0.00382025	7.3e-12	0.443081
Phospholipids to total lipids ratio in very large HDL	rs13389219	2	165528876	T	C	0.0294311	0.00388521	4.7e-15	0.392535
Phospholipids to total lipids ratio in very large HDL	rs138296332	15	59326914	A	T	-0.0562553	0.010109	1.3e-08	0.038145
Phospholipids to total lipids ratio in very large HDL	rs1546954	1	230303848	G	T	0.0398801	0.00389044	7.6e-26	0.612654
Phospholipids to total lipids ratio in very large HDL	rs1560390	15	58580781	C	T	-0.0752353	0.00459909	1.2e-62	0.219671
Phospholipids to total lipids ratio in very large HDL	rs1569209	8	19830170	G	T	0.0763036	0.0067797	2e-30	0.085308
Phospholipids to total lipids ratio in very large HDL	rs1569721	20	44768710	C	T	-0.066809	0.0103544	5.6e-11	0.961901
Phospholipids to total lipids ratio in very large HDL	rs1849490	7	28249048	A	T	-0.0387266	0.00654989	5.7e-09	0.09253
Phospholipids to total lipids ratio in very large HDL	rs187776	15	58646011	C	G	0.0342817	0.0043906	4.6e-16	0.748999
Phospholipids to total lipids ratio in very large HDL	rs261291	15	58680178	C	T	0.170765	0.00395813	1e-200	0.356091
Phospholipids to total lipids ratio in very large HDL	rs2803619	10	113934384	C	G	-0.0264167	0.00424321	6.9e-10	0.724372
Phospholipids to total lipids ratio in very large HDL	rs2811290	1	178572978	T	C	0.0240599	0.00381223	1.2e-10	0.467938
Phospholipids to total lipids ratio in very large HDL	rs2972146	2	227100698	T	G	-0.0272167	0.00395636	2.1e-13	0.64635
Phospholipids to total lipids ratio in very large HDL	rs3092498	20	44055710	C	T	0.0287346	0.00382207	2.6e-13	0.517365
Phospholipids to total lipids ratio in very large HDL	rs34060476	7	73037956	G	A	0.0682191	0.0055602	1e-34	0.134806
Phospholipids to total lipids ratio in very large HDL	rs3809113	12	57848708	G	C	0.0243449	0.00419194	2.7e-09	0.710446
Phospholipids to total lipids ratio in very large HDL	rs4418728	10	94839724	T	G	0.0245014	0.00381244	9.3e-11	0.450721
Phospholipids to total lipids ratio in very large HDL	rs4843771	16	88027771	C	G	-0.0230364	0.00409743	9.8e-09	0.682975
Phospholipids to total lipids ratio in very large HDL	rs5082	1	161193683	A	G	-0.0353972	0.00391822	1.3e-18	0.620712
Phospholipids to total lipids ratio in very large HDL	rs55714927	17	7080316	T	C	0.0442137	0.00482467	3.2e-21	0.190999
Phospholipids to total lipids ratio in very large HDL	rs58542926	19	19379549	T	C	0.0544479	0.00723455	1.8e-13	0.074409
Phospholipids to total lipids ratio in very large HDL	rs59104589	2	242237902	T	C	0.0236401	0.00395469	1.3e-10	0.358835
Phospholipids to total lipids ratio in very large HDL	rs6082	15	58837957	G	A	0.0415666	0.00694164	4.6e-09	0.082102
Phospholipids to total lipids ratio in very large HDL	rs61462211	7	130468015	C	G	-0.026824	0.00416039	2.1e-10	0.324661
Phospholipids to total lipids ratio in very large HDL	rs62433138	7	1066297	C	T	-0.0328618	0.00383739	1.5e-17	0.429145
Phospholipids to total lipids ratio in very large HDL	rs6465679	7	98005617	T	A	-0.0269866	0.00443757	3.7e-10	0.756125
Phospholipids to total lipids ratio in very large HDL	rs6498540	16	15130594	G	A	-0.0292645	0.00412605	3e-13	0.30207
Phospholipids to total lipids ratio in very large HDL	rs6694102	1	182119332	A	G	-0.0296216	0.00406052	1.4e-13	0.320928
Phospholipids to total lipids ratio in very large HDL	rs676210	2	21231524	A	G	0.0333531	0.00467672	2.7e-12	0.205779
Phospholipids to total lipids ratio in very large HDL	rs7241918	18	47160953	T	G	0.0406676	0.00498393	5.2e-16	0.822899
Phospholipids to total lipids ratio in very large HDL	rs72555385	7	73123473	G	A	-0.0499059	0.00880573	3.6e-08	0.049312
Phospholipids to total lipids ratio in very large HDL	rs72836561	17	41926126	T	C	-0.0799954	0.0108665	2.7e-14	0.031468
Phospholipids to total lipids ratio in very large HDL	rs72894778	6	35457727	T	C	0.0376018	0.00677065	3.5e-08	0.08586
Phospholipids to total lipids ratio in very large HDL	rs72934503	6	98588754	G	A	0.024299	0.00389031	4.4e-10	0.451405
Phospholipids to total lipids ratio in very large HDL	rs737337	19	11347493	C	T	-0.0415835	0.00712128	1.7e-08	0.076786
Phospholipids to total lipids ratio in very large HDL	rs7599	19	36038390	G	A	0.0258342	0.00392926	3.8e-11	0.631448
Phospholipids to total lipids ratio in very large HDL	rs76070947	20	44113286	G	C	-0.0693655	0.00904558	1.4e-14	0.046943
Phospholipids to total lipids ratio in very large HDL	rs77960347	18	47109955	G	A	0.16253	0.0165736	4.4e-23	0.013242
Phospholipids to total lipids ratio in very large HDL	rs7832515	8	144306379	G	A	0.0318112	0.00489497	2.9e-11	0.187778
Phospholipids to total lipids ratio in very large HDL	rs78689694	11	126234820	C	G	-0.0380049	0.00560446	1.4e-13	0.133342
Phospholipids to total lipids ratio in very large HDL	rs821840	16	56994528	G	A	0.136984	0.00404964	1e-200	0.32453
Phospholipids to total lipids ratio in very large HDL	rs921919	12	125265201	A	G	-0.0357585	0.00412085	2.5e-19	0.669524
Phospholipids to total lipids ratio in very large HDL	rs9424467	1	232807192	G	C	0.0226487	0.00415888	3.1e-08	0.307404
Phospholipids to total lipids ratio in very large HDL	rs964184	11	116648917	C	G	0.0692523	0.00559212	3e-36	0.867287
Phospholipids to total lipids ratio in very large HDL	rs998584	6	43757896	A	C	-0.0322787	0.00379999	3.2e-17	0.482348
Uridine	rs131794	22	50971752	C	A	-0.0146	0.0018	4.36717e-16	0.7926
Uridine	rs2686796	7	48102911	T	C	0.0094	0.0017	1.88899e-08	0.4524
Uridine	rs532545	1	20915172	T	C	-0.0095	0.0017	3.40997e-08	0.3065
Acetoacetate	rs11745373	5	41868991	A	T	-0.0531678	0.00474111	3.50026e-29	0.255153
Acetoacetate	rs144305620	12	122583527	A	G	-0.037933	0.00525424	5.19996e-13	0.191526
Acetoacetate	rs150515955	6	166775103	T	C	-0.106913	0.0121095	1.10002e-18	0.029997
Acetoacetate	rs2255400	10	113936244	C	A	0.0271722	0.00461344	3.89996e-09	0.723682
Acetoacetate	rs4240624	8	9184231	A	G	0.0474691	0.00719184	4.10015e-11	0.909224
Acetoacetate	rs910502	1	230294185	T	A	-0.0331158	0.0058389	1.40001e-08	0.852037
Acetoacetate	rs964184	11	116648917	C	G	-0.0633215	0.00608306	2.19989e-25	0.867252
3-Hydroxybutyrate	rs10127775	1	230295789	T	A	-0.0302326	0.00422503	8.30042e-13	0.60552
3-Hydroxybutyrate	rs117643180	17	7185779	A	C	-0.0849923	0.0130808	8.19974e-11	0.025821
3-Hydroxybutyrate	rs12314700	12	122490043	T	A	-0.0350217	0.00532395	4.79954e-11	0.185173
3-Hydroxybutyrate	rs2419604	10	113944271	G	A	0.0409399	0.00461202	6.90081e-19	0.72335
3-Hydroxybutyrate	rs2575876	9	107665739	A	G	-0.0316957	0.00475019	2.49977e-11	0.251996
3-Hydroxybutyrate	rs2645433	8	11657921	C	G	-0.0276302	0.00426017	8.80035e-11	0.389652
3-Hydroxybutyrate	rs28929474	14	94844947	T	C	-0.158295	0.0147558	7.50067e-27	0.020014
3-Hydroxybutyrate	rs35853021	15	58680643	T	G	-0.0292474	0.00430506	1.10002e-11	0.357701
3-Hydroxybutyrate	rs4149307	9	107589744	T	C	0.0347025	0.00566933	9.29994e-10	0.15539
3-Hydroxybutyrate	rs429358	19	45411941	C	T	0.054874	0.00571035	7.29962e-22	0.154879
3-Hydroxybutyrate	rs473224	15	58737341	G	T	0.0340063	0.00591221	8.79995e-09	0.853944
3-Hydroxybutyrate	rs585188	5	41702897	A	G	-0.0459785	0.00473538	2.70023e-22	0.255311
3-Hydroxybutyrate	rs72702354	14	94643207	G	A	-0.068998	0.0103685	2.80027e-11	0.041522
3-Hydroxybutyrate	rs964184	11	116648917	C	G	-0.0486628	0.00608193	1.20005e-15	0.867411
3-Hydroxybutyrate	rs9930957	16	72149923	T	C	0.0632021	0.00562402	2.70023e-29	0.159786
3-Hydroxybutyrate	rs9987289	8	9183358	G	A	0.0654579	0.0071752	7.29962e-20	0.909164
